# Supplementary material for: Electrosynthesis of ruthenium nanocluster incorporated nickel diselenide for efficient overall water splitting
Source: Royal Society of Chemistry journal article supplement (doi:10.1039/d3ta06988e), 2024-01-01
Supplement: d3ta06988e1.pdf [file d3ta06988e1.pdf]

## Supplementary Information

### Electrosynthesis of Ruthenium Nanocluster Incorporated Nickel Diselenide for Efficient Overall Water Splitting

Vipin Yadav<sup>a</sup>, Megha<sup>b</sup>, Prasenjit Sen<sup>\*b</sup> and M. M. Shaijumon<sup>\*a</sup>

<sup>a</sup> School of Physics, Indian Institute of Science Education and Research Thiruvananthapuram, Maruthamala PO, Thiruvananthapuram, Kerala 695551, India.

Email: shaiju@iisertvm.ac.in

<sup>b</sup> Harish-Chandra Research Institute, HBNI, Chhatnag Road, Jhansi, Allahabad, 211019, India.

Email: prasen@hri.res.in

#### Contents:

1. Fig. S1. Schematic illustration for materials synthesis.
2. Fig. S2. XRD pattern of bare nickel foam with a corresponding reference pattern.
3. Fig. S3. High-resolution SEM image of NiSe<sub>2</sub>.
4. Fig. S4. SEM-EDAX elemental mapping of Ni, Se of NiSe<sub>2</sub>.
5. Fig. S5. HR-TEM image of NiSe<sub>2</sub>.
6. Fig. S6. HER LSV plots and OER LSV plots of prepared electrodes measured at a scan rate of 2 mV sec<sup>-1</sup> in 1 M KOH.
7. Fig. S7. Post XPS Analysis of ruthenium 3p after OER stability test.
8. Fig. S8. Post XPS Analysis of nickel 2p after OER stability test.
9. Fig. S9. Post XPS Analysis of selenium 3d after OER stability test.
10. Fig. S10. Post SEM Analysis of 50-Ru-NiSe<sub>2</sub> after OER stability test.
11. Fig. S11. Full cell chronoamperometry test for overall water splitting of 50-Ru-NiSe<sub>2</sub> as both anode and cathode
12. Fig. S12. Cyclic voltammograms of nickel foam, NiSe<sub>2</sub>, and 50-Ru-NiSe<sub>2</sub> in 1 M KOH at different scan rates.  $\Delta J$  vs. scan rate plots for Cdl calculations of NF, NiSe<sub>2</sub>, and 50-Ru-NiSe<sub>2</sub>.
13. Table S1. Comparison of HER performance of variously reported catalysts with ruthenium cluster decorated nickel diselenide catalysts in an alkaline medium.

14. Table S2. OER performance of Ru cluster decorated nickel diselenide with variously reported catalysts in an alkaline medium.
15. Note S1. Potential conversion from Hg/HgO to RHE.
16. Note S2. Electrical double-layer capacitance ( $C_{dl}$ ) calculation.
17. Table S3. Comparison of full cell performance of variously reported catalysts with ruthenium cluster doped nickel diselenide catalysts in an alkaline medium.
18. Table S4.  $C_{dl}$  values were calculated for NiSe<sub>2</sub>-200 and 50-Ru-NiSe<sub>2</sub>.
19. Note S3. Computational details for density functional theory (DFT) calculation.
20. Table S5. Adsorption energy,  $E_{ads}(H_2O)$ , of an H<sub>2</sub>O molecule at various possible sites of NiSe<sub>2</sub> and Ru<sub>8</sub>-NiSe<sub>2</sub>(210) surfaces.
21. Fig. S13. Crystal structure of NiSe<sub>2</sub> and Ru<sub>8</sub>-NiSe<sub>2</sub> for the theory calculations.
22. Table S6. Adsorption free energy,  $\Delta G_{OH^*}$ , of OH at various possible sites of NiSe<sub>2</sub> and Ru<sub>8</sub>-NiSe<sub>2</sub>(210) surfaces.
23. Table S7. Calculated values of  $\Delta G$  (in eV) for intermediate steps of OER and  $\eta$  (in V) at various sites of NiSe<sub>2</sub> and Ru<sub>8</sub>-NiSe<sub>2</sub>(210) surfaces.

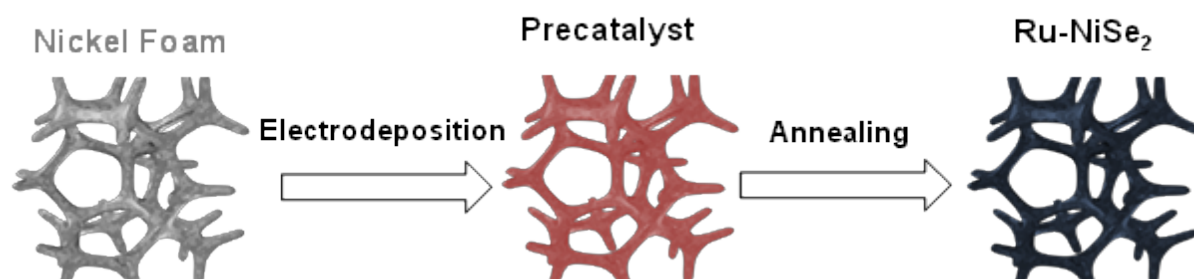

**Fig. S1.** Schematic illustration of the electro-synthesis of ruthenium cluster decorated nickel diselenide supported on nickel foam (Ru-NiSe<sub>2</sub>).

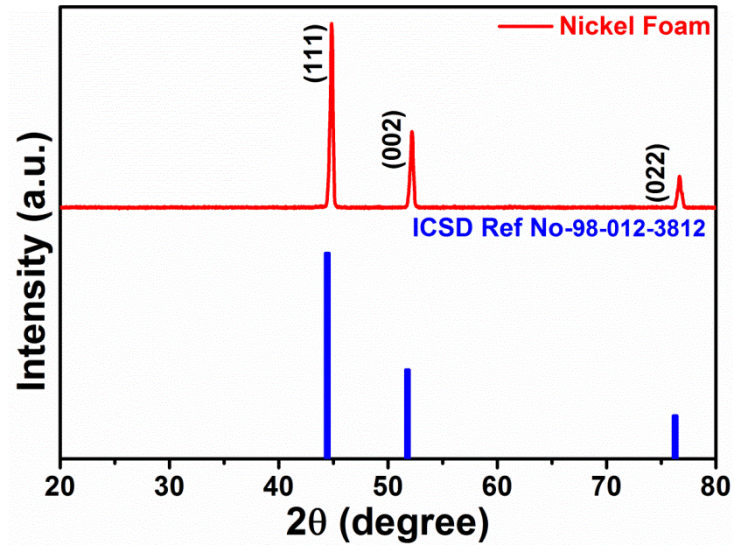

Fig. S2. XRD pattern of bare nickel foam with corresponding plans of (111), (002), and (022) at respective 2 theta angles.

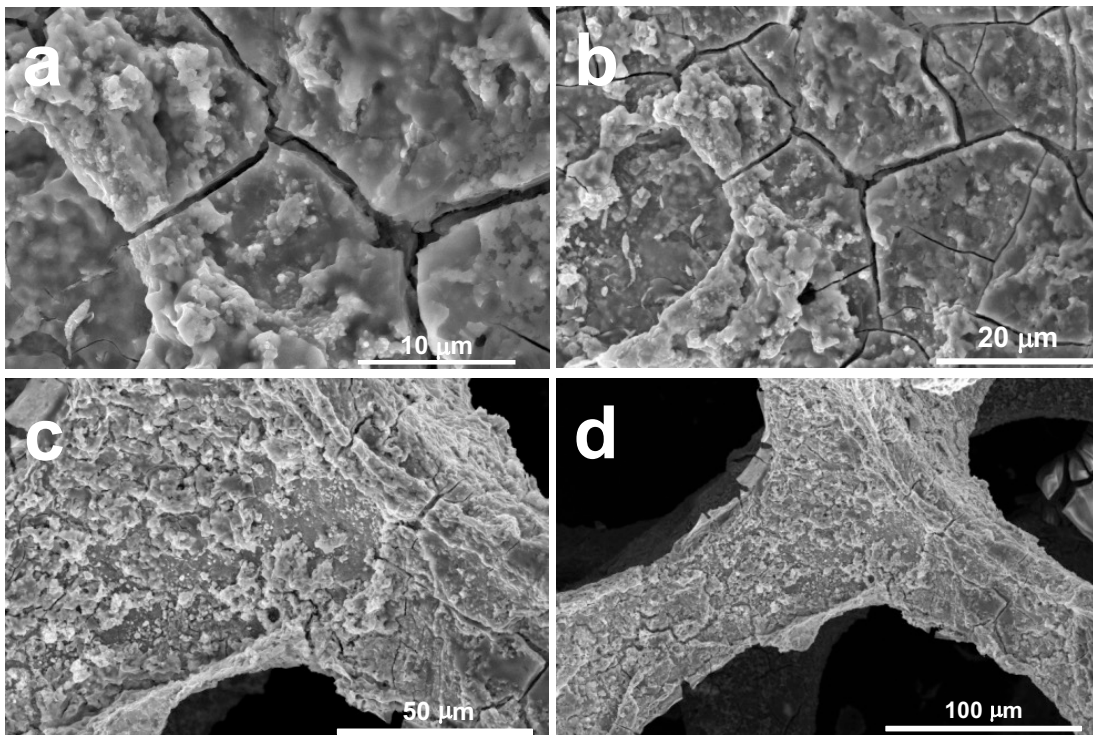

Fig. S3. SEM image of electrodeposited NiSe<sub>2</sub> sample over NF at different magnifications.

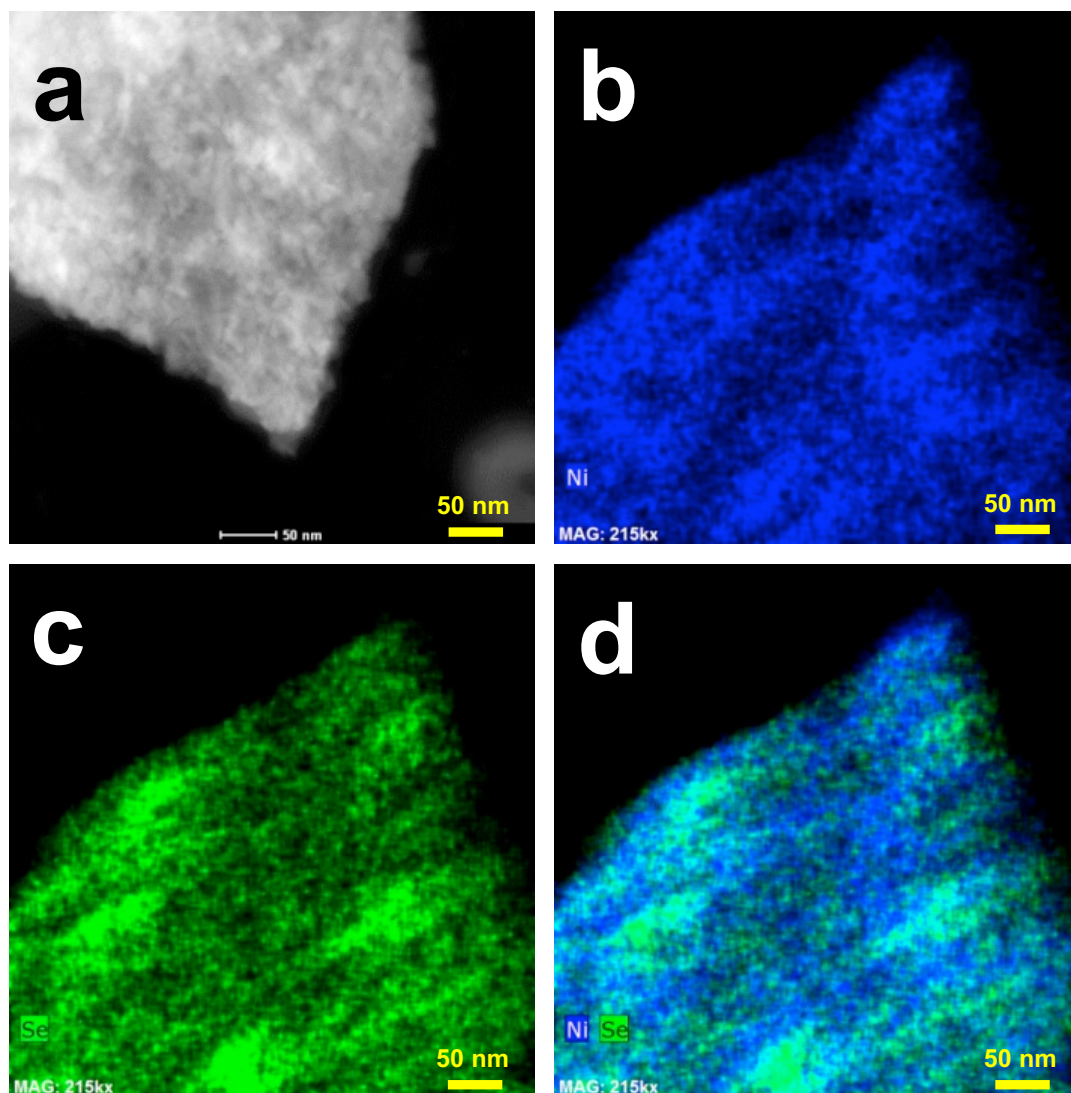

**Fig. S4.** EDAX mapping. (a) Field Image of NiSe<sub>2</sub>, (b) elemental mapping of nickel, (c) elemental mapping of selenium, (d) merge of both images (b) and (c).



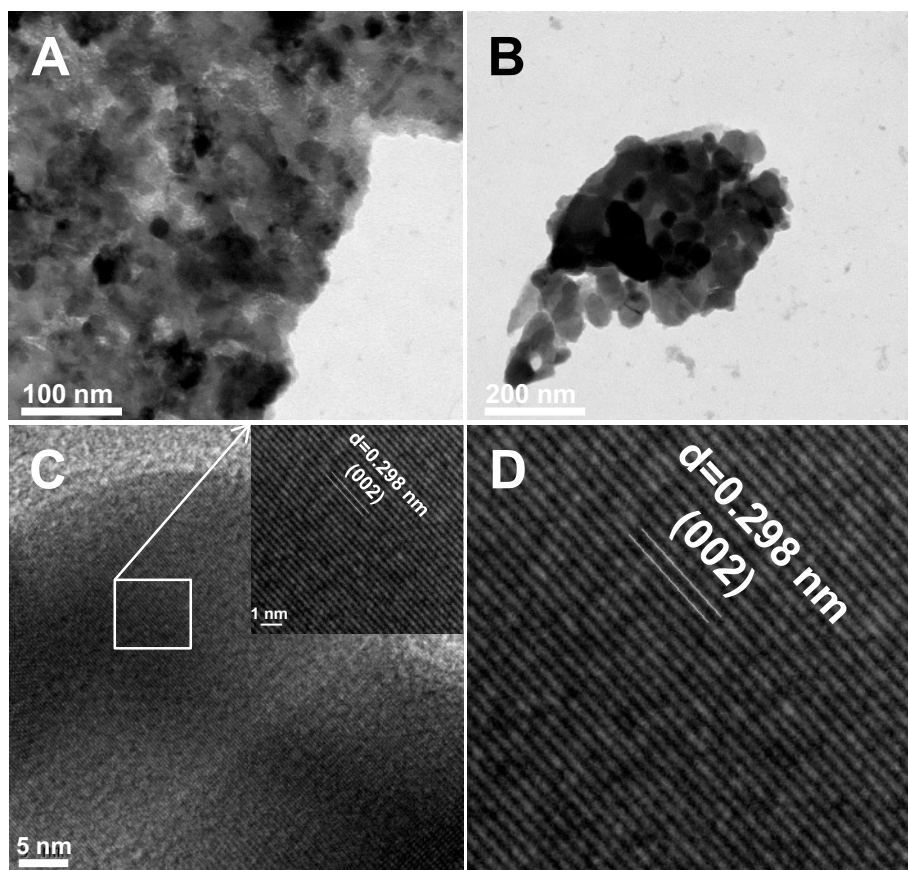

Fig. S5. TEM images (a-b) low magnification, and (c-d) high magnification TEM images of NiSe<sub>2</sub>.

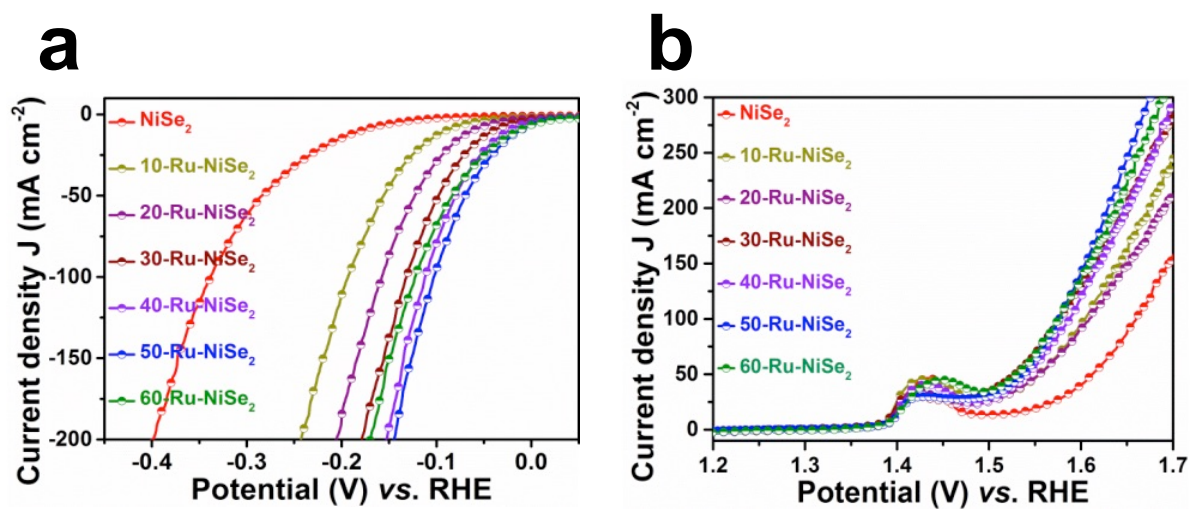

Fig. S6. HER and OER LSV. (a) HER LSV plots, and (b) OER LSV plots of prepared electrodes measured at a scan rate of 2 mV sec<sup>-1</sup> in 1.0 M KOH.

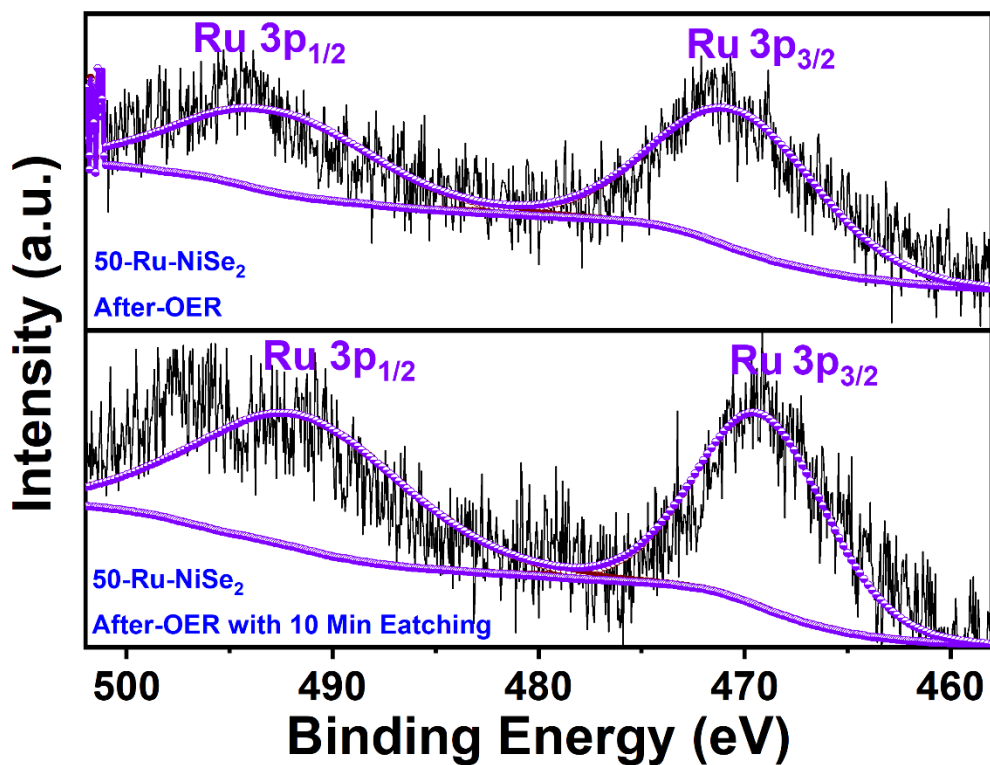

Fig. S7. Post XPS Analysis of ruthenium 3p after OER stability test.

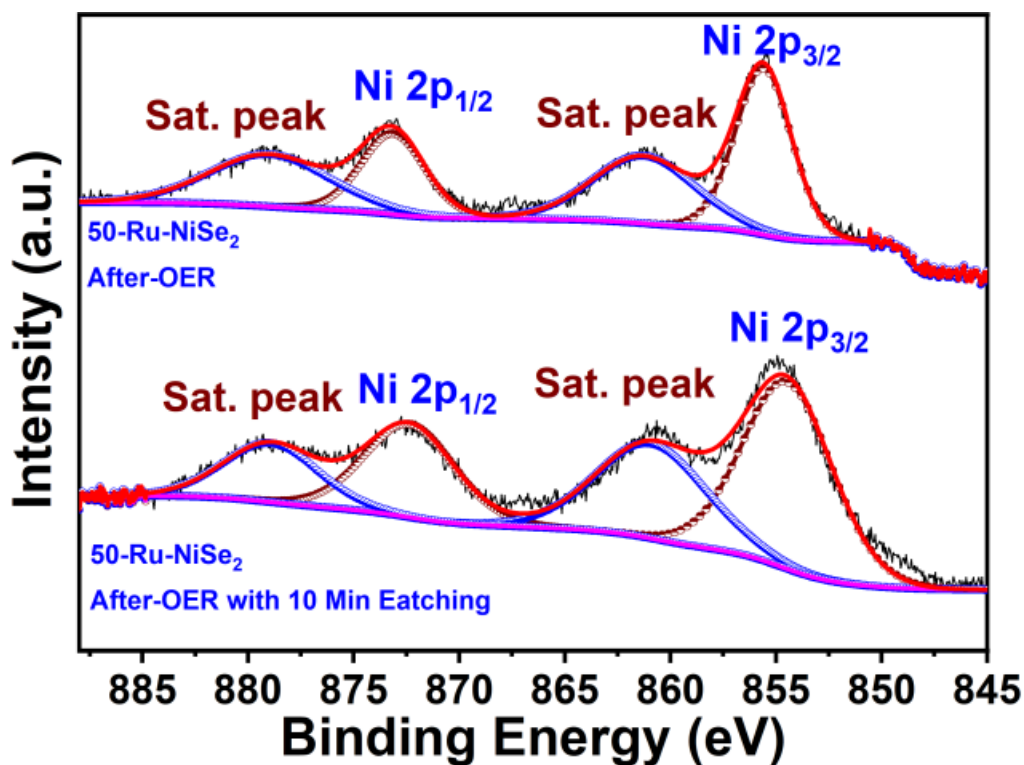

Fig. S8. Post XPS Analysis of Nickel 2p after OER stability test.

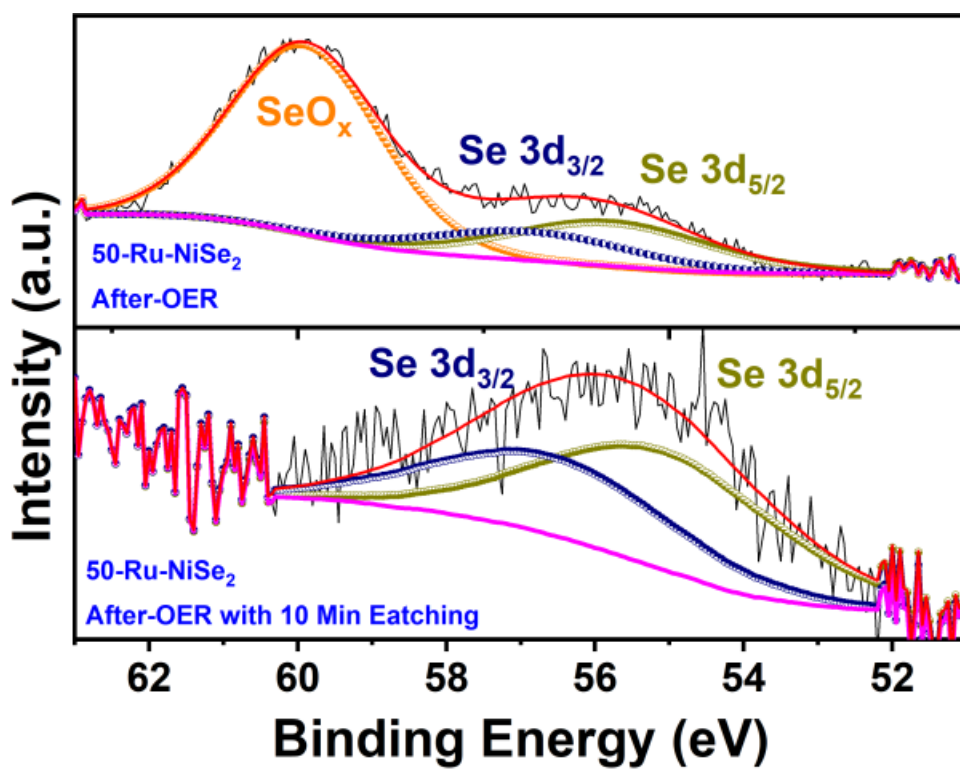

Fig. S9. Post XPS Analysis of Selenium 3d after OER stability test.

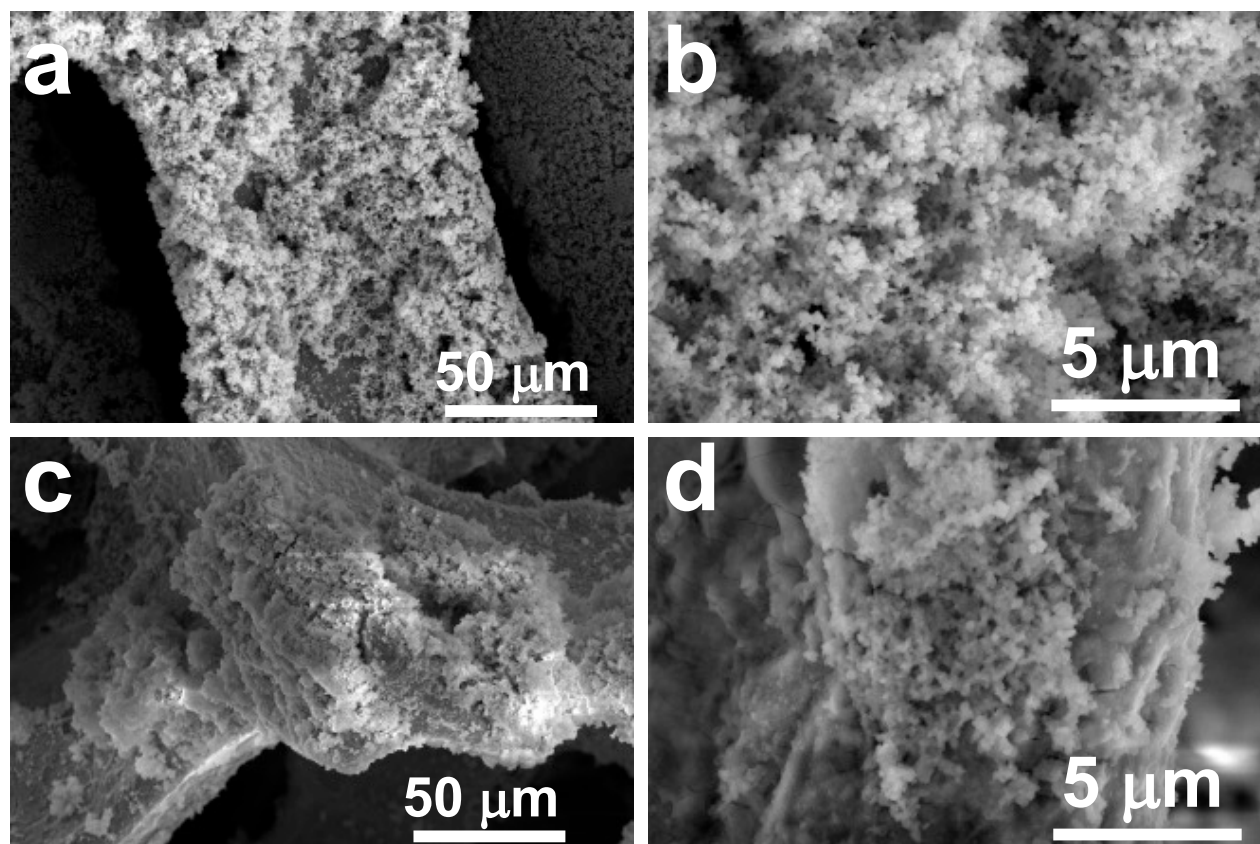

Fig. S10. Comparison between SEM Analysis of 50-Ru-NiSe<sub>2</sub> before, after OER stability test. (a-b) SEM image of 50-Ru-NiSe<sub>2</sub> before anodic reaction, (c-d) SEM image of 50-Ru-NiSe<sub>2</sub> after anodic reaction

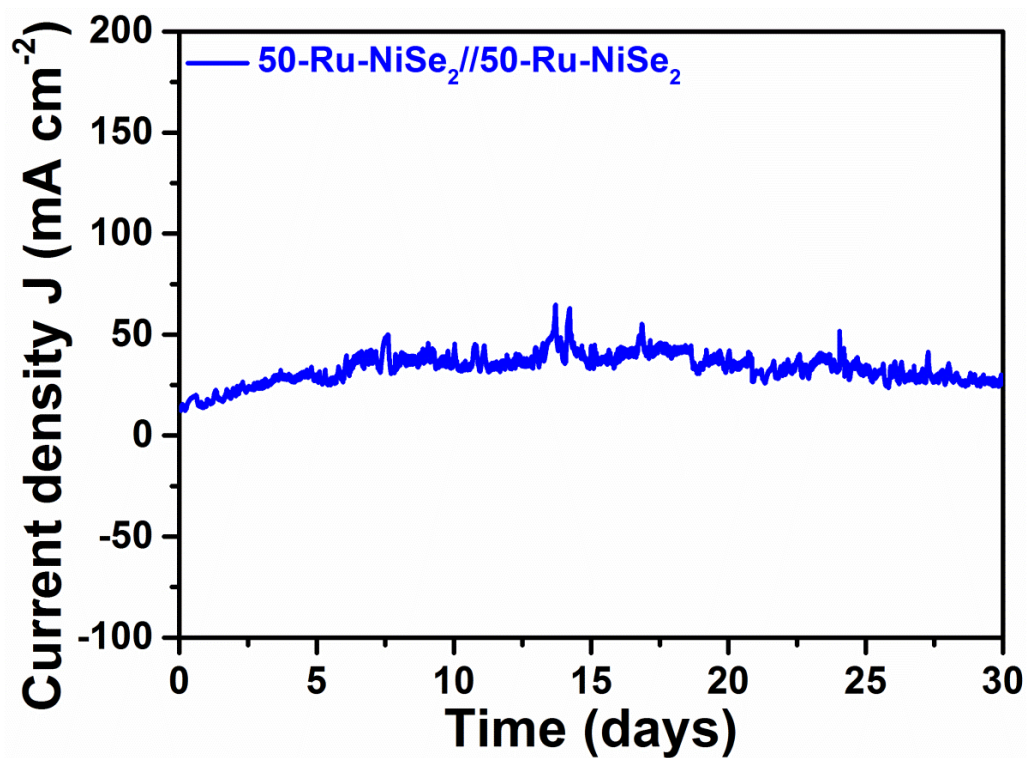

Fig. S11. Chronoamperometry test of 50-Ru-NiSe<sub>2</sub>//50-Ru-NiSe<sub>2</sub> used as both anode and cathode for overall water splitting and it is showing 30 days long-term stability.



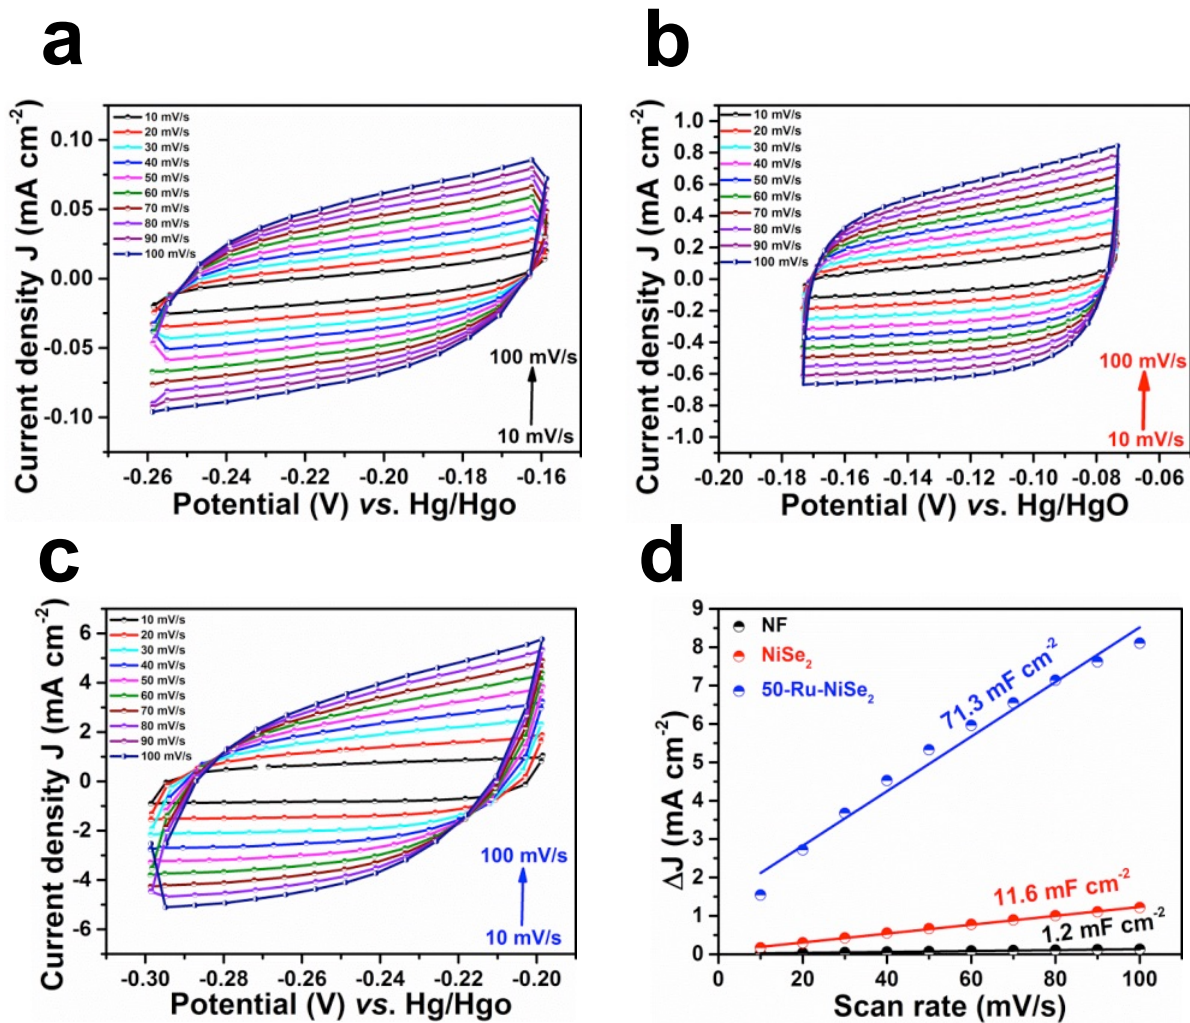

Fig. S12. Cyclic voltammograms in 1 M KOH at different scan rates. (a) Bare nickel foam, (b)  $\text{NiSe}_2$ , (c) 50-Ru- $\text{NiSe}_2$ , (d)  $\Delta J$  vs. scan rate plots for  $C_{dl}$  calculations.

**Note S1.** Potential conversion from Hg/HgO to RHE

All potentials were converted to a reversible hydrogen electrode (RHE) by Equation: <sup>1</sup>

$$E_{\text{RHE}} = E_{\text{Hg/HgO}} + E^0_{\text{Hg/HgO}} + 0.059 \times \text{pH}$$

**Note S2.** Electrical double-layer capacitance ( $C_{\text{dl}}$ ) calculation using cyclic voltammetry (CV) in 1 M KOH

The CVs of NiSe<sub>2</sub> and 50-Ru-NiSe<sub>2</sub> at different scan rates (10 mV s<sup>-1</sup> to 100 mV s<sup>-1</sup>) in 1 M KOH are performed. We plotted  $\Delta J$  vs. scan rate, and the slope ( $C_{\text{dl}}$ ) is determined from the graph. ECSA was evaluated as,

$$\text{ECSA} = C_{\text{dl}}/C_s,$$

The value of  $C_s$  can be taken as 40  $\mu\text{F cm}^{-2}$ .<sup>2</sup>

**Table S1.** Comparison of the electrocatalytic HER activities of various recently reported electrocatalysts.

| S.No | Materials                                 | Overpotential<br>@10 mA cm <sup>-2</sup> | References                                          |
|------|-------------------------------------------|------------------------------------------|-----------------------------------------------------|
| 1    | Ru-NiSe <sub>2</sub>                      | 59                                       | Small 2022, 18, 210530500. <sup>3</sup>             |
| 2    | Ni-MoS <sub>2</sub>                       | 112                                      | Small 2022, 18, 2107238. <sup>4</sup>               |
| 3    | Ru/Co-N-C                                 | 23                                       | Adv. Mater. 2022, 34, 2110103. <sup>5</sup>         |
| 4    | Ni-FeNP (oxide)                           | 46                                       | Nat Commun 2019, 10, 5599. <sup>6</sup>             |
| 5    | NiP <sub>2</sub> /NiSe <sub>2</sub>       | 89                                       | Appl. Catal. B 2021, 282, 119584. <sup>7</sup>      |
| 6    | Fe-Ni <sub>5</sub> P <sub>4</sub> /NiFeOH | 197                                      | Appl. Catal. B 2021, 291, 119987. <sup>8</sup>      |
| 7    | Ni <sub>5</sub> P <sub>4</sub> -Ru        | 54                                       | Adv. Mater. 2020, 32, 1906972. <sup>9</sup>         |
| 8    | Mo-Co <sub>9</sub> S <sub>8</sub> @C      | 113                                      | Adv. Energy Mater. 2020, 10, 1903137. <sup>10</sup> |

|    |                                                       |      |                                                          |
|----|-------------------------------------------------------|------|----------------------------------------------------------|
| 9  | MoO <sub>3</sub> /Ni–NiO                              | 62   | Adv. Mater. 2020, 32, 2003414. <sup>11</sup>             |
| 10 | W-NiS <sub>0.5</sub> Se <sub>0.5</sub>                | 39   | Adv. Mater. 2022, 34, 2107053. <sup>12</sup>             |
| 11 | MoS <sub>2</sub> /Ni <sub>3</sub> S <sub>2</sub>      | 110  | Angew. Chem.Int.Ed 2016, 55, 6702–6707. <sup>13</sup>    |
| 12 | Co-ZnRuO <sub>x</sub>                                 | 17   | Small 2023, 19, 2207235. <sup>14</sup>                   |
| 13 | Ir/MoS <sub>2</sub>                                   | 44   | ACS Energy Lett. 2019, 4, 368–374. <sup>15</sup>         |
| 14 | CoRu–MoS <sub>2</sub>                                 | 52   | Small 2020, 16, 2000081. <sup>16</sup>                   |
| 15 | Mo <sub>2</sub> NiB <sub>2</sub>                      | 160  | Small 2022, 18, 2104303. <sup>17</sup>                   |
| 16 | Ru-NiCoP/NF                                           | 44   | Appl. Catal. B 2020, 279, 119396. <sup>18</sup>          |
| 17 | Co-NC@Mo <sub>2</sub> C                               | 99   | nano energy 2019, 57, 746-752. <sup>19</sup>             |
| 18 | Ni-Mo-P                                               | 69   | Appl. Catal. B 2021, 298, 120494. <sup>20</sup>          |
| 19 | Ru-MoS <sub>2</sub> -Mo <sub>2</sub> C                | 25   | nano energy 2021, 88, 106277. <sup>21</sup>              |
| 20 | (Ru-Ni)O <sub>x</sub>                                 | 14.5 | Appl. Catal. B 2021, 298, 120611. <sup>22</sup>          |
| 21 | MoNi <sub>4</sub> /MoO <sub>2</sub>                   | 41   | nano energy 2023, 109, 108296. <sup>23</sup>             |
| 22 | Co/CoO/CoN                                            | 73   | Chemical Eng. J., 2023, 461, 141937. <sup>24</sup>       |
| 23 | m-NiTPyP                                              | 138  | Adv. Mater. 2023, 2210727. <sup>25</sup>                 |
| 24 | Fe <sub>7.4%</sub> NiSe                               | 161  | J. Mater. Chem. A, 2019,7, 2233-2241. <sup>26</sup>      |
| 25 | NiFe-Se/C                                             | 160  | J. Power Sources, 2017, 366, 193-199. <sup>27</sup>      |
| 26 | a-RuTe <sub>2</sub>                                   | 36   | Nat. Commun. 2019, 10, 5692. <sup>28</sup>               |
| 27 | Fe <sub>0.4</sub> Co <sub>0.3</sub> Ni <sub>0.3</sub> | 175  | Energy Environ. Mater. 2023, 0, e12590. <sup>29</sup>    |
| 28 | MnS <sub>x</sub> Se <sub>1-x</sub> @N,F-<br>CQDs      | 87   | Chemical Eng. J. 2023, 459,141610. <sup>30</sup>         |
| 29 | Fe <sub>1-x</sub> Co <sub>x</sub> P                   | 74   | Chem. Commun., 2023, 59, 2600-2603. <sup>31</sup>        |
| 30 | Co/b-Mo <sub>2</sub> C@N-<br>CNT                      | 170  | Angew. Chem. Int. Ed. 2019, 58, 4923-4928. <sup>32</sup> |
| 31 | Ni <sub>3</sub> S <sub>2</sub> /MoS <sub>2</sub>      | 78   | Appl. Catal. B 2020, 268, 118435. <sup>33</sup>          |

|           |                                      |           |                                              |
|-----------|--------------------------------------|-----------|----------------------------------------------|
| 32        | NiO@NF-<br>6//Ni <sub>2</sub> P@NF-6 | 99        | Nanoscale, 2017, 9, 4409–4418. <sup>34</sup> |
| 33        | Ru <sub>1</sub> /D-NiFe LDH          | 18        | Nat Commun, 2022, 12, 458. <sup>35</sup>     |
| <b>34</b> | <b>50-Ru-NiSe<sub>2</sub></b>        | <b>13</b> | <b>This Work</b>                             |

**Table S2.** OER performance of Ru cluster decorated nickel Diselenide with variously reported catalysts in an alkaline medium..

| S.No | Materials                            | Overpotential<br>@J mA cm <sup>-2</sup> | References                                          |
|------|--------------------------------------|-----------------------------------------|-----------------------------------------------------|
| 1    | Ru/Co–N–C                            | 247@10<br>329@100                       | Adv. Mater. 2022, 34, 2110103. <sup>5</sup>         |
| 2    | NiP <sub>2</sub> /NiSe <sub>2</sub>  | 250@10                                  | Appl. Catal. B 2021, 282, 119584. <sup>7</sup>      |
| 3    | Mo-Co <sub>9</sub> S <sub>8</sub> @C | 200@10                                  | Adv. Energy Mater. 2020, 10, 1903137. <sup>10</sup> |
| 4    | MoO <sub>3</sub> /Ni–NiO             | 347@100                                 | Adv. Mater. 2020, 32, 2003414. <sup>11</sup>        |
| 5    | Co-ZnRuO <sub>x</sub>                | 224@10<br>316@100                       | Small 2023, 19, 2207235. <sup>14</sup>              |
| 6    | Ir/MoS <sub>2</sub>                  | 330@10                                  | ACS Energy Lett. 2019, 4, 368–374. <sup>15</sup>    |
| 7    | CoRu–MoS <sub>2</sub>                | 308@10                                  | Small 2020, 16, 2000081. <sup>16</sup>              |
| 8    | Mo <sub>2</sub> NiB <sub>2</sub>     | 280@10                                  | Small 2022, 18, 2104303. <sup>17</sup>              |
| 9    | Ru-NiCoP/NF                          | 216@20<br>265@50<br>285@100             | Appl. Catal. B 2020, 279,<br>119396. <sup>18</sup>  |
| 10   | Co-NC@Mo <sub>2</sub> C              | 347@10                                  | nano energy 2019, 57, 746-752. <sup>19</sup>        |
| 11   | Ni-Mo-P                              | 235@10                                  | Appl. Catal. B 2021, 298, 120494. <sup>20</sup>     |



|           |                                                                        |                  |                                                              |
|-----------|------------------------------------------------------------------------|------------------|--------------------------------------------------------------|
| 12        | Ru-MoS <sub>2</sub> -<br>Mo <sub>2</sub> C                             | 280@10           | nano energy 2021, 88, 106277. <sup>21</sup>                  |
| 13        | (Ru-Ni)O <sub>x</sub>                                                  | 237.2@10         | Appl. Catal. B 2021, 298, 120611. <sup>22</sup>              |
| 14        | CoNiCH                                                                 | 322@50           | Adv. Sci.2023, 2207495. <sup>36</sup>                        |
| 15        | MoNi <sub>4</sub> /MoO <sub>2</sub>                                    | 298@10           | nano energy 2023, 109, 108296. <sup>23</sup>                 |
| 16        | m-NiTPyP                                                               | 267@10           | Adv. Mater. 2023, 2210727. <sup>25</sup>                     |
| 17        | NiFe-Se/C                                                              | 240@10<br>290@50 | J. Power Sources, 2017, 366, 193-199. <sup>37</sup>          |
| 18        | a-RuTe <sub>2</sub>                                                    | 285@10           | Nat. Commun. 2019, 10, 5692. <sup>28</sup>                   |
| 19        | Co/b-<br>Mo <sub>2</sub> C@N-<br>CNT                                   | 356@10           | Angew. Chem. Int. Ed. 2019, 58, 4923-<br>4928. <sup>32</sup> |
| 20        | Ni <sub>3</sub> S <sub>2</sub> /MoS <sub>2</sub>                       | 260@10           | Appl. Catal. B 2020, 268, 118435. <sup>33</sup>              |
| 21        | NiO@NF-<br>6//Ni <sub>2</sub> P@NF-6                                   | 405@10           | Nanoscale, 2017, 9, 4409–4418. <sup>34</sup>                 |
| 22        | Ni/Ni <sub>8</sub> P <sub>3</sub><br>Ni/Ni <sub>8</sub> S <sub>3</sub> | 270@30<br>340@30 | Adv. Funct. Mater., 2016, 26. 3314-3323. <sup>38</sup>       |
| <b>23</b> | <b>50-Ru-NiSe<sub>2</sub></b>                                          | <b>260@30</b>    | <b>This Work</b>                                             |

---

**Table S3.** Comparison of the electrocatalytic full cell potential of various recently reported electrocatalysts in 1M KOH at 10 mA cm<sup>-2</sup>.

| S.No | Materials                                        | Overpotential<br>@10 mA cm <sup>-2</sup> | Ref.                                                  |
|------|--------------------------------------------------|------------------------------------------|-------------------------------------------------------|
| 1    | Ru-NiSe <sub>2</sub>                             | 1.537                                    | Small 2022, 18, 2105305. <sup>3</sup>                 |
| 2    | Ni-MoS <sub>2</sub>                              | 1.54                                     | Small 2022, 18, 2107238. <sup>4</sup>                 |
| 3    | Ru/Co-N-C                                        | 1.50                                     | Adv. Mater. 2022, 34, 2110103. <sup>5</sup>           |
| 4    | Ni-Fe NP (oxide)                                 | 1.47                                     | Nat Commun 2019, 10, 5599. <sup>6</sup>               |
| 5    | NiP <sub>2</sub> /NiSe <sub>2</sub>              | 1.56                                     | Appl. Catal. B 2021, 282, 119584. <sup>7</sup>        |
| 6    | Fe-Ni <sub>5</sub> P <sub>4</sub> /NiFeOH        | 1.55                                     | Appl. Catal. B 2021,291, 119987. <sup>8</sup>         |
| 7    | Ni <sub>5</sub> P <sub>4</sub> -Ru               | --                                       | Adv. Mater. 2020, 32, 1906972. <sup>9</sup>           |
| 8    | Mo-Co <sub>9</sub> S <sub>8</sub> @C             | 1.56                                     | Adv. Energy Mater. 2020, 10, 1903137. <sup>10</sup>   |
| 9    | MoO <sub>3</sub> /Ni-NiO                         | 1.55                                     | Adv. Mater. 2020, 32, 2003414. <sup>11</sup>          |
| 10   | W-NiS <sub>0.5</sub> Se <sub>0.5</sub>           | 1.44                                     | Adv. Mater. 2022, 34, 2107053. <sup>12</sup>          |
| 11   | MoS <sub>2</sub> /Ni <sub>3</sub> S <sub>2</sub> | 1.56                                     | Angew. Chem.Int.Ed 2016, 55, 6702–6707. <sup>13</sup> |
| 12   | Co-ZnRuO <sub>x</sub>                            | 1.48                                     | Small 2023, 19, 2207235. <sup>14</sup>                |
| 13   | Ir/MoS <sub>2</sub>                              | 1.57                                     | ACS Energy Lett. 2019, 4, 368–374. <sup>15</sup>      |
| 14   | Mo <sub>2</sub> NiB <sub>2</sub>                 | 1.57                                     | Small 2022, 18, 2104303. <sup>17</sup>                |
| 15   | Ru-NiCoP/NF                                      | 1.515                                    | Appl. Catal. B 2020, 279,119396. <sup>18</sup>        |
| 16   | Co-NC@Mo <sub>2</sub> C                          | 1.685                                    | nano energy 2019, 57, 746-752. <sup>19</sup>          |
| 17   | Ni-Mo-P                                          | 1.46                                     | Appl. Catal. B 2021, 298, 120494. <sup>20</sup>       |
| 18   | Ru-MoS <sub>2</sub> -Mo <sub>2</sub> C           | 1.49                                     | nano energy 2021, 88, 106277. <sup>21</sup>           |
| 17   | (Ru-Ni)O <sub>x</sub>                            | 1.48                                     | Appl. Catal. B 2021, 298, 120611. <sup>22</sup>       |

|    |                                                       |             |                                                          |
|----|-------------------------------------------------------|-------------|----------------------------------------------------------|
| 20 | CoNiCH                                                | 1.51        | Adv. Sci.2023, 2207495. <sup>36</sup>                    |
| 21 | MoNi <sub>4</sub> /MoO <sub>2</sub>                   | 1.598       | nano energy 2023, 109, 108296. <sup>23</sup>             |
| 22 | Co/CoO/CoN                                            | 1.48        | Chemical Eng. J., 2023, 461, 141937. <sup>24</sup>       |
| 23 | m-NiTPyP                                              | 1.62        | Adv. Mater. 2023, 2210727. <sup>25</sup>                 |
| 24 | Fe <sub>7.4%</sub> -NiSe                              | 1.58        | J. Mater. Chem. A, 2019,7, 2233-2241. <sup>26</sup>      |
| 25 | NiFe-Se/C                                             | 1.68        | J. Power Sources, 2017, 366, 193-199. <sup>37</sup>      |
| 26 | a-RuTe <sub>2</sub>                                   | 1.52        | Nat. Commun. 2019, 10, 5692. <sup>28</sup>               |
| 27 | Fe <sub>0.4</sub> Co <sub>0.3</sub> Ni <sub>0.3</sub> | 1.62        | Energy Environ. Mater. 2023, 0, e12590. <sup>29</sup>    |
| 28 | MnS <sub>x</sub> Se <sub>1-x</sub> @N,F-CQDs          | 1.55        | Chemical Eng. J. 2023, 459,141610. <sup>30</sup>         |
| 29 | Fe <sub>1-x</sub> Co <sub>x</sub> P                   | 1.59        | Chem. Commun., 2023, 59, 2600-2603. <sup>31</sup>        |
| 30 | Co <sub>3</sub> O <sub>4</sub>                        | 1.63        | Angew. Chem. Int. Ed. 2017, 56, 1324. <sup>39</sup>      |
| 31 | Co/b-Mo <sub>2</sub> C@N-CNT                          | 1.64        | Angew. Chem. Int. Ed. 2019, 58, 4923-4928. <sup>32</sup> |
| 32 | Ni <sub>3</sub> S <sub>2</sub> /MoS <sub>2</sub>      | 1.53        | Appl. Catal. B 2020, 268, 118435. <sup>33</sup>          |
| 33 | NiO@NF-6//Ni <sub>2</sub> P@NF-6                      | 1.65        | Nanoscale, 2017, 9, 4409–4418. <sup>34</sup>             |
| 34 | Ni/Ni <sub>8</sub> P <sub>3</sub>                     | 1.61        | Adv. Funct. Mater., 2016, 26: 3314-3323. <sup>38</sup>   |
| 35 | Ru1/D-NiFe LDH                                        | 1.44        | Nat Commun, 2022, 12, 458. <sup>35</sup>                 |
| 36 | <b>50-Ru-NiSe<sub>2</sub></b>                         | <b>1.45</b> | <b>This Work</b>                                         |

**Table S4.**  $C_{dl}$  values were calculated for NiSe<sub>2</sub> and 50-Ru-NiSe<sub>2</sub>.

| Catalyst                | $C_{dl}$ (mF cm <sup>-2</sup> ) |
|-------------------------|---------------------------------|
| NF                      | 1.2                             |
| NiSe <sub>2</sub>       | 11.6                            |
| 50-Ru-NiSe <sub>2</sub> | 71.3                            |

## Computational Details

16. Note S3. *Computational Details for density functional theory (DFT) calculations.*

### For HER:

The free energy for H adsorption is calculated as:

$$\Delta G_{H^*} = E_{ads}(H) + \Delta ZPE_H - T\Delta S_H \quad (1)$$

where,  $E_{ads}(H) = E(H^*) - E(*) - E(H_2)$ , represents the adsorption energy of the H atom on the surface.  $E(H^*)$  and  $E(*)$  are the total energies of the surface with and without H and  $E(H_2)$  is the total energy of a gas-phase H<sub>2</sub> molecule. The terms  $\Delta ZPE_H$  and  $\Delta S_H$  account for the difference in zero point energy (ZPE) and entropy between the adsorbed and gas-phase hydrogen, respectively.

We use the fact that vibrational entropy in the adsorbed state is small, approximately equal to half the entropy of a free H<sub>2</sub> molecule, ( $S_{H_2}^0$ ) at standard conditions ( $S_{H_2}^0 = 0.41$  eV). The values of  $\Delta ZPE_H$  and  $T\Delta S_H$  used in our calculations are taken from the literature,<sup>40</sup> resulting in a total contribution of 0.24 eV. Thus, throughout this work, we consider  $\Delta G_{H^*} = E_{ads}(H) + 0.24$  eV.

Similarly, the free energy of OH adsorption is determined using the equation:

$$\Delta G_{OH^*} = E_{ads}(OH) + \Delta ZPE_{OH} - T\Delta S_{OH} \quad (2)$$



In this expression, the total energy of the gas-phase OH is calculated as  $E(\text{OH}) = E(\text{H}_2\text{O}) - \frac{1}{2}E(\text{H}_2)$ . The value of  $\Delta ZPE - T\Delta S$  for OH adsorption is 0.35 eV, obtained using the respected values given in the literature.<sup>40\</sup>

**For OER:**

The intermediate reaction steps involved in an OER are as follows:

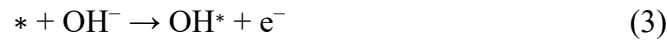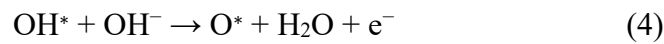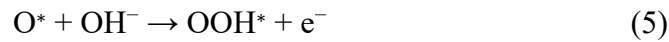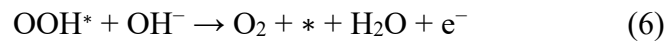

The free energy change at each of these reaction steps is calculated using the following expressions:

$$\Delta G_1 = G(\text{OH}^*) - G(*) - G(\text{OH}^- - \text{e}^-) \quad (7)$$

$$\Delta G_2 = G(\text{O}^*) + G(\text{H}_2\text{O}) - G(\text{OH}^*) - G(\text{OH}^- - \text{e}^-) \quad (8)$$

$$\Delta G_3 = G(\text{OOH}^*) - G(\text{O}^*) - G(\text{OH}^- - \text{e}^-) \quad (9)$$

$$\Delta G_4 = G(*) + G(\text{O}_2) + G(\text{H}_2\text{O}) - G(\text{OOH}^*) - G(\text{OH}^- - \text{e}^-) \quad (10)$$

While calculating these  $\Delta G$  values, we consider the following factors:

- The free energy of the adsorbed species is calculated as:  $\Delta G = E_{ads} + \Delta ZPE - T\Delta S$ . Here, the total energies of the surface before and after the adsorption, as well as those of the free species, are obtained from DFT calculations. The entropy contribution primarily

comes from the gas-phase species, while the contribution from the adsorbed species is negligible.

- The value of  $G(\text{H}_2\text{O}(l))$  is assumed to be equal to the free energy of gas-phase  $\text{H}_2\text{O}$  molecule at 300 K and 0.035 bar of pressure, where they are in equilibrium. The  $\Delta ZPE$  and  $T\Delta S$  corrections are taken from the literature.<sup>40</sup>
- Since DFT tends to overestimate the binding energy of a gas-phase  $\text{O}_2$  molecule, we calculated its free energy by using the expression:  $E(\text{O}_2) = 2E(\text{H}_2\text{O}) - 2E(\text{H}_2)$ .
- The value of  $G(\text{OH}^- - e^-)$  is determined using the equation:  $G(\text{OH}^- - e^-) = G(\text{H}_2\text{O}(l)) - 1/2G(\text{H}_2) + eU + \ln(10) * k_B T * \text{pH}$ , as suggested by Liu et al.<sup>42</sup> Here,  $U$  is the applied potential,  $e$  denotes the magnitude of the electronic charge, and  $\text{pH}$  refers to the  $\text{pH}$  value of the electrochemical environment. We assume  $U=0$  and consider the last term involving  $\text{pH}$  to be zero, ensuring that the potentials obtained from free energy calculations are referenced to the RHE electrode.

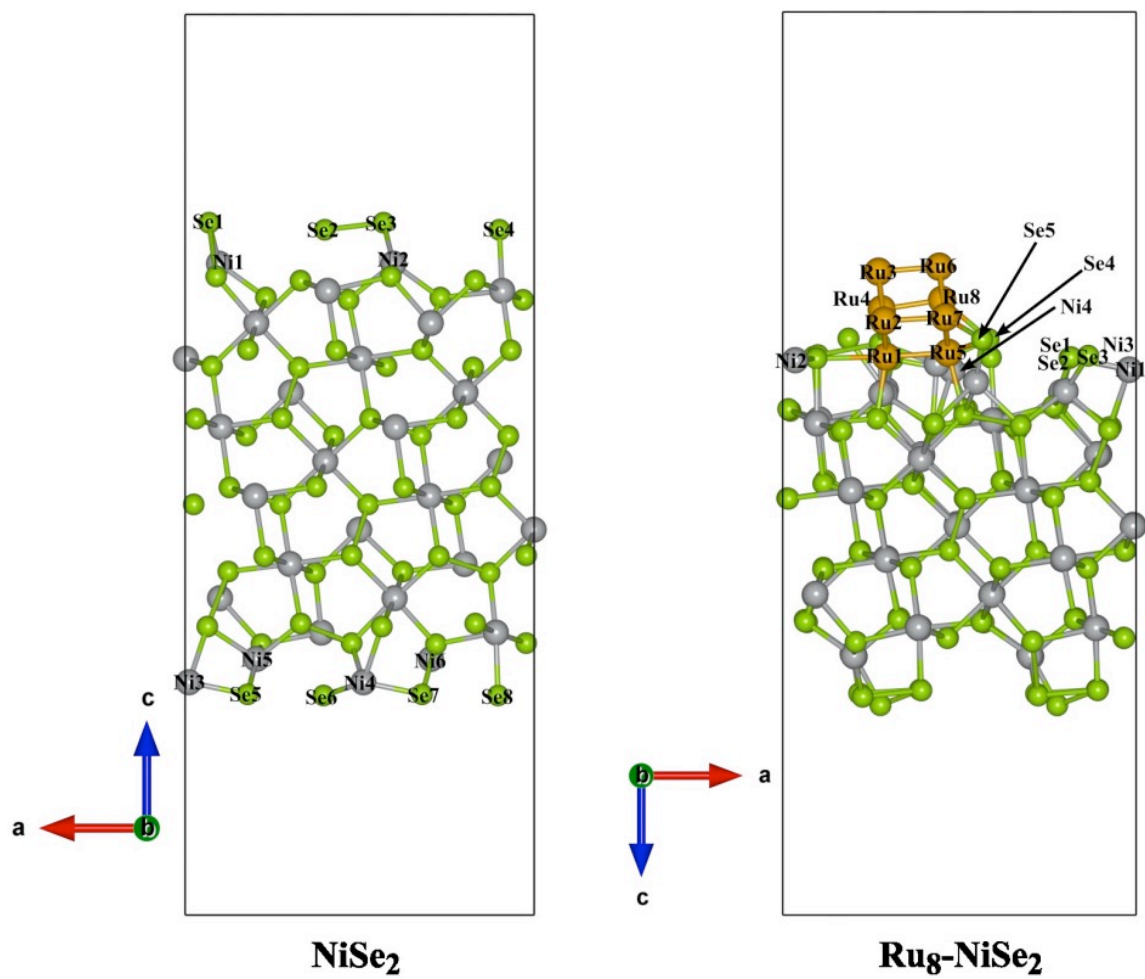

**Fig. S13.** Crystal structures of studied samples. Side-view of the structures of pristine and Ru<sub>8</sub>-NiSe<sub>2</sub>(210) systems. Green, grey, and golden-yellow-colored balls represent Se, Ni, and Ru atoms, respectively.

**Table S5.** Adsorption energy,  $E_{ads}(\text{H}_2\text{O})$ , of a  $\text{H}_2\text{O}$  molecule at various possible sites of  $\text{NiSe}_2(210)$  and  $\text{Ru}_8\text{-NiSe}_2(210)$  surfaces.

| <b>System</b>                                 | <b><math>E_{ads}(\text{H}_2\text{O})</math></b> | <b>Relaxed position of <math>\text{H}_2\text{O}</math></b> |
|-----------------------------------------------|-------------------------------------------------|------------------------------------------------------------|
| <b><math>\text{NiSe}_2</math></b>             | -0.50                                           | Ni1 - top                                                  |
|                                               | -0.35                                           | Ni2 - top                                                  |
|                                               | -0.83                                           | Ni3 - top                                                  |
|                                               | -0.60                                           | Ni4 - top                                                  |
|                                               | -0.51                                           | Ni5 - top                                                  |
|                                               | -0.45                                           | Ni6 - top                                                  |
| <b><math>\text{Ru}_8\text{-NiSe}_2</math></b> | -1.08                                           | Ru6 - top                                                  |
|                                               | -0.87                                           | Ru3 - top                                                  |
|                                               | -0.60                                           | Ru4 - top                                                  |
|                                               | -0.54                                           | Ni3 - top                                                  |
|                                               | -0.51                                           | Ru8 - top                                                  |
|                                               | -0.38                                           | Ni4 - top                                                  |



**Table S6.** Adsorption free energy,  $\Delta G_{\text{OH}^*}$ , of OH at various possible sites of NiSe<sub>2</sub>(210) and Ru<sub>8</sub>-NiSe<sub>2</sub>(210) surfaces.

| <b>System</b>                          | <b><math>\Delta G_{\text{OH}^*}</math></b> | <b>Relaxed position of OH</b> |
|----------------------------------------|--------------------------------------------|-------------------------------|
| <b>NiSe<sub>2</sub></b>                | 0.97                                       | Se2 - top                     |
|                                        | 0.86                                       | Ni1 - top                     |
|                                        | 1.03                                       | Ni2 - top                     |
|                                        | 1.04                                       | Ni3 - top                     |
|                                        | 1.04                                       | Ni4 - top                     |
|                                        | 0.90                                       | Ni5 - top                     |
|                                        | 0.90                                       | Ni6 - top                     |
| <b>Ru<sub>8</sub>-NiSe<sub>2</sub></b> | -0.97                                      | Ru2-Ru3 bridge                |
|                                        | -0.53                                      | Ru6-top                       |
|                                        | -0.28                                      | Ru3-top                       |
|                                        | 0.02                                       | Ru3-Ru4 bridge                |
|                                        | 0.02                                       | Ru4 - top                     |
|                                        | 0.04                                       | Ru3-Ru6 bridge                |

|      |                |
|------|----------------|
| 0.23 | Ru8-top        |
| 0.51 | Ru6-Ru7 bridge |

**Table S7.** Calculated values of  $\Delta G$  (in eV) for intermediate steps of OER and  $\eta$  (in V) at various sites of NiSe<sub>2</sub>(210) and Ru<sub>8</sub>-NiSe<sub>2</sub>(210) surfaces.

| System                             | Site    | $\Delta G_1$ | $\Delta G_2$ | $\Delta G_3$ | $\Delta G_4$ | $\eta$ |
|------------------------------------|---------|--------------|--------------|--------------|--------------|--------|
| NiSe <sub>2</sub>                  | Se1-top | 1.13         | 1.01         | 2.24         | 0.54         | 1.01   |
|                                    | Se2-top | 0.97         | 0.67         | 2.74         | 0.54         | 1.51   |
|                                    | Se3-top | 1.13         | 1.01         | 2.11         | 0.67         | 0.88   |
|                                    | Se4-top | 1.09         | 0.55         | 2.82         | 0.46         | 1.59   |
|                                    | Se6-top | 1.41         | -0.32        | 3.53         | 0.30         | 2.30   |
|                                    | Se8-top | 1.38         | -0.29        | 3.54         | 0.29         | 2.31   |
| Ru <sub>8</sub> -NiSe <sub>2</sub> | Ru3-top | -0.28        | 0.39         | 2.66         | 2.15         | 1.43   |
|                                    | Ru4-top | 0.02         | -0.02        | 3.19         | 1.73         | 1.96   |
|                                    | Ru6-top | -0.53        | 0.43         | 2.87         | 2.15         | 1.64   |
|                                    | Ru8-top | 0.23         | 0.48         | 2.44         | 1.77         | 1.21   |

---

|                   |      |      |      |      |      |
|-------------------|------|------|------|------|------|
| Ru2-Ru7<br>bridge | 1.01 | 0.30 | 2.96 | 0.65 | 1.73 |
| Se1-top           | 1.30 | 0.12 | 2.92 | 0.58 | 1.69 |
| Se2-top           | 1.09 | 1.15 | 2.02 | 0.66 | 0.79 |
| Se3-top           | 1.14 | 0.85 | 2.41 | 0.52 | 1.18 |

---

## References

- 1 N. P. Dileep, P. V. Sarma, R. Prasannachandran, V. Surendran and M. M. Shaijumon, *ACS Appl Nano Mater*, 2021, **4**, 7206–7212.
- 2 N. P. Dileep, T. V. Vineesh, P. V. Sarma, M. V. Chalil, C. S. Prasad and M. M. Shaijumon, *ACS Appl Energy Mater*, 2020, **3**, 1461–1467.
- 3 R. Qin, P. Wang, Z. Li, J. Zhu, F. Cao, H. Xu, Q. Ma, J. Zhang, J. Yu and S. Mu, *Small*, , DOI:10.1002/sml.202105305.
- 4 G. Wang, G. Zhang, X. Ke, X. Chen, X. Chen, Y. Wang, G. Huang, J. Dong, S. Chu and M. Sui, *Small*, , DOI:10.1002/sml.202107238.
- 5 C. Rong, X. Shen, Y. Wang, L. Thomsen, T. Zhao, Y. Li, X. Lu, R. Amal and C. Zhao, *Advanced Materials*, , DOI:10.1002/adma.202110103.
- 6 B. H. R. Suryanto, Y. Wang, R. K. Hocking, W. Adamson and C. Zhao, *Nat Commun*, , DOI:10.1038/s41467-019-13415-8.
- 7 L. Yang, L. Huang, Y. Yao and L. Jiao, *Appl Catal B*, , DOI:10.1016/j.apcatb.2020.119584.
- 8 C. F. Li, J. W. Zhao, L. J. Xie, J. Q. Wu and G. R. Li, *Appl Catal B*, , DOI:10.1016/j.apcatb.2021.119987.
- 9 Q. He, D. Tian, H. Jiang, D. Cao, S. Wei, D. Liu, P. Song, Y. Lin and L. Song, *Advanced Materials*, , DOI:10.1002/adma.201906972.
- 10 L. Wang, X. Duan, X. Liu, J. Gu, R. Si, Y. Qiu, Y. Qiu, D. Shi, F. Chen, X. Sun, J. Lin and J. Sun, *Adv Energy Mater*, , DOI:10.1002/aenm.201903137.
- 11 X. Li, Y. Wang, J. Wang, Y. Da, J. Zhang, L. Li, C. Zhong, Y. Deng, X. Han and W. Hu, *Advanced Materials*, , DOI:10.1002/adma.202003414.
- 12 Y. Wang, X. Li, M. Zhang, J. Zhang, Z. Chen, X. Zheng, Z. Tian, N. Zhao, X. Han, K. Zaghbi, Y. Wang, Y. Deng and W. Hu, *Advanced Materials*, , DOI:10.1002/adma.202107053.
- 13 J. Zhang, T. Wang, D. Pohl, B. Rellinghaus, R. Dong, S. Liu, X. Zhuang and X. Feng, *Angewandte Chemie*, 2016, **128**, 6814–6819.

- 14 D. Liu, Z. Wu, J. Liu, H. Gu, Y. Li, X. Li, S. Liu, S. Liu and J. Zhang, *Small*, , DOI:10.1002/sml.202207235.
- 15 S. Wei, X. Cui, Y. Xu, B. Shang, Q. Zhang, L. Gu, X. Fan, L. Zheng, C. Hou, H. Huang, S. Wen and W. Zheng, *ACS Energy Lett*, 2019, **4**, 368–374.
- 16 I. S. Kwon, T. T. Debela, I. H. Kwak, Y. C. Park, J. Seo, J. Y. Shim, S. J. Yoo, J. G. Kim, J. Park and H. S. Kang, *Small*, , DOI:10.1002/sml.202000081.
- 17 A. Saad, Y. Gao, K. A. Owusu, W. Liu, Y. Wu, A. Ramiere, H. Guo, P. Tsiakaras and X. Cai, *Small*, , DOI:10.1002/sml.202104303.
- 18 D. Chen, R. Lu, Z. Pu, J. Zhu, H. W. Li, F. Liu, S. Hu, X. Luo, J. Wu, Y. Zhao and S. Mu, *Appl Catal B*, , DOI:10.1016/j.apcatb.2020.119396.
- 19 Q. Liang, H. Jin, Z. Wang, Y. Xiong, S. Yuan, X. Zeng, D. He and S. Mu, *Nano Energy*, 2019, **57**, 746–752.
- 20 B. Zhang, F. Yang, X. Liu, N. Wu, S. Che and Y. Li, *Appl Catal B*, , DOI:10.1016/j.apcatb.2021.120494.
- 21 V. H. Hoa, D. T. Tran, S. Prabhakaran, D. H. Kim, N. Hameed, H. Wang, N. H. Kim and J. H. Lee, *Nano Energy*, 2021, **88**, 106277.
- 22 H. Zhang, Y. Lv, C. Chen, C. Lv, X. Wu, J. Guo and D. Jia, *Appl Catal B*, , DOI:10.1016/j.apcatb.2021.120611.
- 23 X. Meng, Z. Li, Y. Liu, Z. Wang, P. Wang, Z. Zheng, Y. Dai, B. Huang, H. Cheng and J.-H. He, *Nano Energy*, 2023, **109**, 108296.
- 24 W. Zhang, C. Li, J.-Y. Ji, Z. Niu, H. Gu, B. F. Abrahams and J.-P. Lang, *Chemical Engineering Journal*, 2023, **461**, 141937.
- 25 Y. Zhang, S. Chen, Y. Zhang, R. Li, B. Zhao and T. Peng, *Advanced Materials*, 2023, 2210727.
- 26 Z. Zou, X. Wang, J. Huang, Z. Wu and F. Gao, *J Mater Chem A Mater*, 2019, **7**, 2233–2241.
- 27 B. Xu, H. Yang, L. Yuan, Y. Sun, Z. Chen and C. Li, *J Power Sources*, 2017, **366**, 193–199.
- 28 J. Wang, L. Han, B. Huang, Q. Shao, H. L. Xin and X. Huang, *Nat Commun*, , DOI:10.1038/s41467-019-13519-1.
- 29 Y. Chen, L. Yang, C. Li, Y. Wu, X. Lv, H. Wang and J. Qu, *Energy and Environmental Materials*, , DOI:10.1002/eem2.12590.
- 30 B. Sun, G. Dong, J. Ye, D. feng Chai, X. Yang, S. Fu, M. Zhao, W. Zhang and J. Li, *Chemical Engineering Journal*, , DOI:10.1016/j.cej.2023.141610.
- 31 S. Marimuthu, A. Shankar and G. Maduraiveeran, *Chemical Communications*, 2023, **59**, 2600–2603.
- 32 T. Ouyang, Y. Ye, C. Wu, K. Xiao and Z. Liu, *Angewandte Chemie*, 2019, **131**, 4977–4982.
- 33 C. Wang, X. Shao, J. Pan, J. Hu and X. Xu, *Appl Catal B*, , DOI:10.1016/j.apcatb.2019.118435.
- 34 J. Zheng, W. Zhou, T. Liu, S. Liu, C. Wang and L. Guo, *Nanoscale*, 2017, **9**, 4409–4418.
- 35 P. Zhai, M. Xia, Y. Wu, G. Zhang, J. Gao, B. Zhang, S. Cao, Y. Zhang, Z. Li, Z. Fan, C. Wang, X. Zhang, J. T. Miller, L. Sun and J. Hou, *Nat Commun*, 2021, **12**, 4587.
- 36 T. Zeng, B. Guo, Z. Xu, F. Mo, X. Chen, L. Wang, Y. Ding and J. Bai, *Advanced Science*, , DOI:10.1002/advs.202207495.

- 37 B. Xu, H. Yang, L. Yuan, Y. Sun, Z. Chen and C. Li, *J Power Sources*, 2017, **366**, 193–199.
- 38 G. F. Chen, T. Y. Ma, Z. Q. Liu, N. Li, Y. Z. Su, K. Davey and S. Z. Qiao, *Adv Funct Mater*, 2016, **26**, 3314–3323.
- 39 Y. P. Zhu, T. Y. Ma, M. Jaroniec and S. Z. Qiao, *Angewandte Chemie*, 2017, **129**, 1344–1348.
- 40 J. K. Nørskov, T. Bligaard, A. Logadottir, J. R. Kitchin, J. G. Chen, S. Pandelov and U. Stimming, *J Electrochem Soc*, 2005, **152**, J23.
- 41 A. Hellman and R. G. S. Pala, *The Journal of Physical Chemistry C*, 2011, **115**, 12901–12907.
- 42 S. Liu, M. G. White and P. Liu, *The Journal of Physical Chemistry C*, 2016, **120**, 15288–15298.
